# Supplementary material
Source: publisher figshare collection journal article supplement (https://asha.figshare.com/articles/dataset/_/19111628)
Supplement: Supplementary file 1 [file 1]

**Supplemental Material S9.** Length and phonological complexity criteria for nonwords.

| Tasks      | Nonwords     | Syllabic structure | Level of complexity |
|------------|--------------|--------------------|---------------------|
| CL NWR     | /zibu/       | CV-CV              | 0                   |
| CL NWR     | /lita/       | CV-CV              | 0                   |
| CL NWR     | /magi/       | CV-CV              | 0                   |
| CL NWR     | /nuli/       | CV-CV              | 0                   |
| CL NWR     | /sipula/     | CV-CV-CV           | 0                   |
| CL NWR     | /bamudi/     | CV-CV-CV           | 0                   |
| CL NWR     | /malitu/     | CV-CV              | 0                   |
| CL NWR     | /lumika/     | CV-CV-CV           | 0                   |
| CL NWR     | /zipalida/   | CV-CV-CV-CV        | 0                   |
| CL NWR     | /nugitala/   | CV-CV-CV-CV        | 0                   |
| CL NWR     | /kasuluni/   | CV-CV-CV-CV        | 0                   |
| CL NWR     | /litisagu/   | CV-CV-CV-CV        | 0                   |
| CL NWR     | /sibumakila/ | CV-CV-CV-CV-CV     | 0                   |
| CL NWR     | /dulikasumu/ | CV-CV-CV-CV-CV     | 0                   |
| CL NWR     | /maluziguba/ | CV-CV-CV-CV-CV     | 0                   |
| CL NWR     | /litapimudi/ | CV-CV-CV-CV-CV     | 0                   |
| French NWR | /abo/        | V-CV               | 1                   |
| French NWR | /tizjõ/      | CV-CSV             | 1                   |
| French NWR | /zobwẽ/      | CV-CSV             | 1                   |
| French NWR | /ʃurval/     | CVC-CVC            | 1                   |
| French NWR | /fløvir/     | CCV-CVC            | 2                   |
| French NWR | /rẽpoli/     | CV-CV-CV           | 0                   |
| French NWR | /ladõ/       | CV-CV              | 0                   |
| French NWR | /mystafo/    | CVC-CV-CV          | 1                   |
| French NWR | /puʃo/       | CV-CV              | 0                   |
| French NWR | /saljẽ/      | CV-CSV             | 1                   |
| French NWR | /fajame/     | CV-SV-CV           | 0                   |
| French NWR | /drigõbir/   | CCV-CV-CVC         | 2                   |
| French NWR | /vjolasel/   | CSV-CV-CVC         | 1                   |
| French NWR | /gramãtar/   | CCV-CV-CVC         | 2                   |
| French NWR | /caranel/    | CV-CV-CVC          | 1                   |

| Tasks          | Nonwords  | Syllabic structure | Level of complexity |
|----------------|-----------|--------------------|---------------------|
| French NWR     | /bidwano/ | CV-CSV-CV          | 1                   |
| Portuguese NWR | /mɐviɐ/   | CV-CV-V            | 0                   |
| Portuguese NWR | /sɛlgɐ/   | CVC-CV             | 0                   |
| Portuguese NWR | /nɛit/    | CVVC               | 0                   |
| Portuguese NWR | /pam/     | CVCC               | 0                   |
| Portuguese NWR | /ɔdevɐ/   | V-CV-CV            | 1                   |
| Portuguese NWR | /kluzɐ/   | CCV-CV             | 2                   |
| Portuguese NWR | /izudɐ/   | V-CV-CV            | 1                   |
| Portuguese NWR | /fɛnoɐ/   | CV-CV-V            | 0                   |
| Portuguese NWR | /tilm/    | CVCC               | 0                   |
| Portuguese NWR | /ɛrdɔl/   | VC-CVC             | 1                   |
| Portuguese NWR | /sɛij/    | CVVC               | 0                   |
| Portuguese NWR | /gretu/   | CCV-CV             | 2                   |
| Portuguese NWR | /rɛnɐɔ/   | CV-CV-V            | 0                   |
| Portuguese NWR | /fɛt/     | CVC                | 0                   |
| Portuguese NWR | /pɛrsu/   | CVC-CV             | 0                   |
| Portuguese NWR | /ɛdɔdɐ/   | V-CV-CV            | 1                   |
| Portuguese NWR | /gɔt/     | CVC                | 0                   |
| Portuguese NWR | /dail/    | CVVC               | 0                   |
| Portuguese NWR | /blizɐ/   | CCV-CV             | 2                   |
| Portuguese NWR | /brɛm/    | CCVC               | 2                   |
| Portuguese NWR | /ɛʒizu/   | V-CV-CV            | 1                   |
| Portuguese NWR | /luvɛj/   | CV-CVV             | 0                   |
| Portuguese NWR | /vuidu/   | CV-V-CV            | 0                   |
| Portuguese NWR | /trɛf/    | CCVC               | 2                   |
| Portuguese NWR | /mɛrij/   | CV-CVC             | 0                   |

*Note.* The repetition tasks come from the Exalang (Thibault & Helloin, 2010) and Palpa-p (Castro et al., 2007) tests. The two language-specific tasks have a phonological complexity that can be described on a 3-gradient scale based on Dos Santos & Ferré (2018) and Mateus et al., (2005): complexity 0 = simple structure like consonant-vowel, CV: /ladɔ/, /fɛt/; complexity 1 = intersyllabic cluster, beginning of non-word by vowel or consonant-semi vowel: /bidwano/, /ɛdɔdɐ/; and complexity 2 = intrasyllabic cluster: /drigɔbir/, /trɛf/. NRW = nonword repetition task; CL = Crosslinguistic task; C = consonant; V = vowel; SV = semi-vowel.
