# Supplementary material
Source: publisher figshare collection journal article supplement (https://asha.figshare.com/articles/dataset/_/19111628)
Supplement: Supplementary file 2 [file 1]

**Supplemental Material S6. Errors in NWR tasks.**

| Error types                  | French NWR  |              |                     |          | Portuguese NWR |             |                  |          | CL NWR       |              |            |          |
|------------------------------|-------------|--------------|---------------------|----------|----------------|-------------|------------------|----------|--------------|--------------|------------|----------|
|                              | Sum TD      | Sum DLD      | <sup>1</sup> TD/DLD | <i>V</i> | Sum TD         | Sum DLD     | TD/DLD           | <i>V</i> | Sum TD       | Sum DLD      | TD/DLD     | <i>V</i> |
| <b><i>Phoneme level</i></b>  | 20<br>(54%) | 162<br>(61%) | $p < .001^{***}$    | .794     | 17<br>(40%)    | 91<br>(49%) | $p = .001^{***}$ | .856     | 124<br>(57%) | 222<br>(47%) | $p = .224$ | .534     |
| Consonant substitutions      | 10<br>(27%) | 95<br>(36%)  | $p < .001^{***}$    | .736     | 12<br>(28%)    | 46<br>(25%) | $p = .026^*$     | .679     | 59<br>(27%)  | 122<br>(26%) | /          | .493     |
| Vowel substitutions          | 4<br>(11%)  | 29<br>(11%)  | $p = .007^{**}$     | .441     | 4<br>(9%)      | 22<br>(12%) | $p = .010^{**}$  | .568     | 42<br>(19%)  | 70<br>(15%)  | /          | .358     |
| Consonant additions          | 6<br>(15%)  | 25<br>(9%)   | $p = .031^*$        | .379     | 1<br>(2%)      | 9<br>(5%)   | $p = .092$       | .378     | 20<br>(9%)   | 24<br>(5%)   | /          | .240     |
| Vowel additions              | 0<br>(0%)   | 13<br>(5%)   | $p = .007^{**}$     | .382     | 0<br>(0%)      | 14<br>(8%)  | $p = .002^{**}$  | .618     | 3<br>(1.5%)  | 6<br>(0%)    | /          | .132     |
| <b><i>Syllable level</i></b> | 9<br>(24%)  | 70<br>(26%)  | $p = .040^*$        | .479     | 17<br>(40%)    | 55<br>(30%) | $p = .237$       | .551     | 54<br>(25%)  | 180<br>(37%) | $p = .461$ | .459     |
| Consonant omissions          | 5<br>(14%)  | 36<br>(14%)  | $p = .060$          | .382     | 3<br>(8%)      | 4<br>(2%)   |                  | .213     | 19<br>(9%)   | 94<br>(20%)  | /          | .430     |
| Vowel omissions              | 1<br>(3%)   | 9<br>(3%)    | $p = .038^*$        | .318     | 9<br>(21%)     | 16<br>(9%)  |                  | .192     | 35<br>(16%)  | 86<br>(18%)  | /          | .408     |
| Cluster reduction            | 3<br>(8%)   | 25<br>(9%)   | $p = .023^*$        | .381     | 5<br>(12%)     | 35<br>(19%) |                  | .434     | /            | /            | /          | /        |
| <b><i>Word level</i></b>     | 8<br>(22%)  | 34<br>(13%)  | $p < .001^{***}$    | .566     | 9<br>(20%)     | 40<br>(21%) | $p = .047^*$     | .590     | 40<br>(18%)  | 75<br>(16%)  | $p = .116$ | .416     |
| Assimilations                | 3<br>(8%)   | 15<br>(6%)   | $p = .009^{**}$     | .380     | 4<br>(9%)      | 7<br>(3%)   | $p = .828$       | .165     | 17<br>(8%)   | 36<br>(8%)   | /          | .307     |
| Lexicalizations              | 4<br>(11%)  | 9<br>(3%)    | $p = .418$          | .180     | 4<br>(9%)      | 25<br>(13%) | $p = .025^*$     | .559     | 1<br>(0.5%)  | 1<br>(0%)    | /          | .003     |
| Creations                    | 0<br>(0%)   | 6<br>(2%)    | $p = .081$          | .294     | 0<br>(0%)      | 0<br>(0%)   | /                | /        | 7<br>(3%)    | 22<br>(5%)   | /          | .301     |

| Error types  | French NWR   |               |                     |          | Portuguese NWR |               |            |          | CL NWR        |               |        |          |
|--------------|--------------|---------------|---------------------|----------|----------------|---------------|------------|----------|---------------|---------------|--------|----------|
|              | Sum TD       | Sum DLD       | <sup>1</sup> TD/DLD | <i>V</i> | Sum TD         | Sum DLD       | TD/DLD     | <i>V</i> | Sum TD        | Sum DLD       | TD/DLD | <i>V</i> |
| Metathesis   | 1<br>(3%)    | 4<br>(2%)     | $p = .354$          | .174     | 1<br>(2%)      | 8<br>(4%)     | $p = .283$ | .335     | 15<br>(7%)    | 16<br>(3%)    | /      | .244     |
| <b>Total</b> | 37<br>(100%) | 266<br>(100%) |                     |          | 43<br>(100%)   | 186<br>(100%) |            |          | 218<br>(100%) | 477<br>(100%) |        |          |

*Note.*  $N = 61$  ( $n = 31$  children with a DLD and 30 children with a TD /  $n = 30$  bilingual children and 31 monolingual children). The repetition tasks are taken from the Exalang (Thibault & Helloin, 2010) and Palpa-p (Castro et al., 2007) test batteries.  $*p < .05$ .  $**p < .01$ .  $***p < .001$ . NRW = nonword repetition task; CL = Crosslinguistic task; TD = children with typical development; DLD = children with a development language disorder; *V* = Cramer's *V*.

<sup>1</sup> The *p*-values come from the Fisher's exact test.
