# Supplementary material
Source: publisher figshare collection journal article supplement (https://asha.figshare.com/articles/dataset/_/19111628)
Supplement: Supplementary file 3 [file 1]

**Supplemental Material S1.** Factors influencing performance on repetition tasks.

| Tasks          | Scoring method | Disorder                                 | $\eta^2$ | Bilingualism                      | $\eta^2$ | Disorder $\times$ Bilingualism    | Age                                      |
|----------------|----------------|------------------------------------------|----------|-----------------------------------|----------|-----------------------------------|------------------------------------------|
| French NWR     | words          | $F(1, 54) = 65.85$ ,<br>$p < .001^{***}$ | .472     | $F(1, 54) = 3.34$ ,<br>$p = .073$ | .064     | $F(1, 54) = 0.00$ ,<br>$p = .986$ | $F(1, 54) = 15.49$ ,<br>$p < .001^{***}$ |
| French NWR     | phonemes       | $F(1, 54) = 75.53$ ,<br>$p < .001^{***}$ | .379     | $F(1, 54) = 2.26$ ,<br>$p < .138$ | .050     | $F(1, 54) = 0.00$ ,<br>$p = .942$ | $F(1, 54) = 14.57$ ,<br>$p < .001^{***}$ |
| Portuguese NWR | words          | $F(1, 25) = 15.5$ ,<br>$p = .010^{**}$   | .172     | /                                 | /        | /                                 | $F(1, 25) = 18.61$ ,<br>$p < .001^{***}$ |
| Portuguese NWR | phonemes       | $F(1, 25) = 20.54$ ,<br>$p < .001^{***}$ | .411     | /                                 | /        | /                                 | $F(1, 25) = 32.14$ ,<br>$p < .001^{***}$ |
| CL NWR         | words          | $F(1, 54) = 18.61$ ,<br>$p < .001^{***}$ | .276     | $F(1, 54) = 0.18$ ,<br>$p = .673$ | .010     | $F(1, 54) = 1.14$ ,<br>$p = .290$ | $F(1, 54) = 5.78$ ,<br>$p = .020^*$      |
| CL NWR         | phonemes       | $F(1, 54) = 14.32$ ,<br>$p < .001^{***}$ | .174     | $F(1, 54) = 0.10$ ,<br>$p = .749$ | .025     | $F(1, 54) = 2.19$ ,<br>$p = .144$ | $F(1, 54) = 4.07$ ,<br>$p = .048^*$      |

*Note.*  $N = 61$  ( $n = 31$  children with a DLD and 30 children with a TD /  $n = 30$  bilingual children and 31 monolingual children). The repetition tasks are taken from the Exalang (Thibault & Helloin, 2010) and Palpa-p (Castro et al., 2007) test batteries. NRW = nonword repetition task; CL= crosslinguistic;  $\eta^2$  = partial eta-squared.

\*  $p < .05$ . \*\*  $p < .01$ . \*\*\*  $p < .001$ .
