# Supplementary material
Source: publisher figshare collection journal article supplement (https://asha.figshare.com/articles/dataset/_/19111628)
Supplement: Supplementary file 4 [file 1]

**Supplemental Material S5.** Effect of stimuli characteristics.

| Tasks          | Scoring method | Length                                         | $\eta^2$ | Length $\times$ Disorder                      | Phonological complexity                       | $\eta^2$ | Phonological complexity $\times$ Disorder     |
|----------------|----------------|------------------------------------------------|----------|-----------------------------------------------|-----------------------------------------------|----------|-----------------------------------------------|
| French NWR     | word           | $F(1, 59) = 22.79$ ,<br>$p < .001^{***}$       | .279     | $F(1, 59) = 2.31$ ,<br>$p = .133$             | $F(1.7, 100.4) = 25.97$ ,<br>$p < .001^{***}$ | .306     | $F(1.7, 100.4) = 15.75$ ,<br>$p < .001^{***}$ |
| French NWR     | phoneme        | $F(1, 59) = 21.44$ ,<br>$p < .001^{***}$       | .267     | $F(1, 59) = 8.98$ ,<br>$p = .004^{**}$        | $F(1.64, 97.21) = 9.75$ ,<br>$p < .001^{***}$ | .142     | $F(1.64, 97.21) = 6.53$ ,<br>$p = .002^{**}$  |
| Portuguese NWR | word           | $F(1.8, 49.1) = 4.59$ ,<br>$p = .018^*$        | .141     | $F(1.8, 49.1) = 1.58$ ,<br>$p = .217$         | $F(1.7, 47.8) = 22.34$ ,<br>$p < .001^{***}$  | .444     | $F(1.7, 47.8) = 3.82$ ,<br>$p = .035^*$       |
| Portuguese NWR | phoneme        | $F(1.8, 52.1) = 5.97$ ,<br>$p = .005^{**}$     | .176     | $F(1.8, 52.1) = 1.84$ ,<br>$p = .171$         | $F(1.5, 44.1) = 33.85$ ,<br>$p < .001^{***}$  | .547     | $F(1.5, 44.1) = 7.26$ ,<br>$p = .004^{**}$    |
| CL NWR         | word           | $F(2.5, 152.9) = 26.23$ ,<br>$p < .001^{***}$  | .308     | $F(2.5, 152.9) = 5.20$ ,<br>$p = .003^{**}$   | /                                             | /        | /                                             |
| CL NWR         | phoneme        | $F(1.28, 75.74) = 39.36$ ,<br>$p < .001^{***}$ | .400     | $F(1.28, 75.74) = 9.41$ ,<br>$p = .001^{***}$ | /                                             | /        | /                                             |

*Note.*  $N = 61$  ( $n = 31$  children with a DLD and 30 children with a TD /  $n = 30$  bilingual children and 31 monolingual children). The repetition tasks are taken from the Exalang (Thibault & Helloin, 2010) and Palpa-p (Castro et al., 2007) test batteries. NWR = nonword repetition task; CL = crosslinguistic;  $\eta^2$  = partial eta-squared.

\* $p < .05$ . \*\* $p < .01$ . \*\*\* $p < .001$ .
